# Supplementary material for: Mangiferin alleviates trimethylamine-N-oxide (TMAO)-induced atherogenesis and modulates gut microbiota in mice
Source: Royal Society of Chemistry journal article supplement (doi:10.1039/d3fo02791k), 2023-01-01
Supplement: d3fo02791k1.pdf [file d3fo02791k1.pdf]

## Supplementary materials

**Table S1** Composition of three diets namely a control diet (CTL), a high-choline diet with 1% free choline (Choline), and a high-choline diet with 1% free choline plus 0.5% mangiferin (Choline + MGF).

| <b>Ingredient (g)</b>     | <b>CTL</b>    | <b>Choline</b> | <b>Choline + MGF</b> |
|---------------------------|---------------|----------------|----------------------|
| Corn starch               | 600.2         | 600.2          | 600.2                |
| Casein                    | 140.0         | 140.0          | 140.0                |
| Sucrose                   | 100.0         | 100.0          | 100.0                |
| Powdered cellulose        | 50.0          | 50.0           | 50.0                 |
| Lard                      | 40.0          | 40.0           | 40.0                 |
| AIN 93 Mineral Mix        | 35.0          | 35.0           | 35.0                 |
| Gelatin                   | 20.0          | 20.0           | 20.0                 |
| AIN 93 Vitamin Mix        | 10.0          | 10.0           | 10.0                 |
| Choline Bitartrate        | 2.5           | 2.5            | 2.5                  |
| <sub>DL</sub> -Methionine | 2.3           | 2.3            | 2.3                  |
| Choline chloride*         | -             | 13.4           | 13.4                 |
| Mangiferin                | -             | -              | 5.0                  |
| <b>Total</b>              | <b>1000.0</b> | <b>1013.4</b>  | <b>1018.4</b>        |
| <b>kcal/g</b>             | <b>3.9</b>    | <b>3.9</b>     | <b>3.9</b>           |
| <b>% kcal</b>             |               |                |                      |
| Carbohydrate              | 73.8          | 73.8           | 73.8                 |
| Protein                   | 16.9          | 16.9           | 16.9                 |
| Fat                       | 9.4           | 9.4            | 9.4                  |

\*Choline chloride equivalent to 1% free choline was dissolved in distilled water and then mixed with the other ingredients.

**Table S2** Relative abundance (%) of 25 key genera among three groups of ApoE<sup>-/-</sup> mice fed a control diet (CTL), a high-choline diet with 1% free choline (Choline), or a high-choline diet with 1% free choline plus 0.5% mangiferin (Choline + MGF) for 15 weeks.

| Relative abundance (%)         | CTL                       | Choline                    | Choline + MGF              | <i>p</i> value |
|--------------------------------|---------------------------|----------------------------|----------------------------|----------------|
| <i>Acetatifactor</i>           | 2.94 ± 1.48 <sup>a</sup>  | 2.58 ± 1.41 <sup>a</sup>   | 0.20 ± 0.31 <sup>b</sup>   | 0.001          |
| <i>Akkermansia</i>             | 1.67 ± 2.42 <sup>b</sup>  | 1.36 ± 1.79 <sup>b</sup>   | 19.10 ± 12.12 <sup>a</sup> | 0.003          |
| <i>Alistipes</i>               | 11.14 ± 5.89              | 11.47 ± 4.93               | 17.77 ± 4.84               | 0.065          |
| <i>Allobaculum</i>             | 0.00 ± 0.00               | 0.00 ± 0.00                | 1.71 ± 3.39                | 0.063          |
| <i>Bacteroides</i>             | 1.58 ± 1.86 <sup>b</sup>  | 4.28 ± 5.62 <sup>ab</sup>  | 6.48 ± 2.43 <sup>a</sup>   | 0.005          |
| <i>Bilophila</i>               | 2.01 ± 1.76 <sup>a</sup>  | 1.23 ± 0.37 <sup>ab</sup>  | 0.12 ± 0.07 <sup>b</sup>   | 0.001          |
| <i>Blautia</i>                 | 3.24 ± 4.41 <sup>ab</sup> | 10.66 ± 10.58 <sup>a</sup> | 0.65 ± 1.11 <sup>b</sup>   | 0.022          |
| <i>Desulfovibrio</i>           | 1.54 ± 0.66 <sup>b</sup>  | 1.27 ± 0.81 <sup>b</sup>   | 3.35 ± 1.41 <sup>a</sup>   | 0.005          |
| <i>Dubosiella</i>              | 1.19 ± 1.85               | 0.48 ± 0.49                | 0.02 ± 0.05                | 0.095          |
| <i>Faecalibaculum</i>          | 1.01 ± 1.55               | 0.71 ± 0.87                | 2.19 ± 2.91                | 0.129          |
| <i>GCA-900066575</i>           | 3.07 ± 1.29 <sup>a</sup>  | 1.00 ± 1.03 <sup>b</sup>   | 0.61 ± 0.26 <sup>b</sup>   | 0.003          |
| <i>Helicobacter</i>            | 5.50 ± 2.28 <sup>b</sup>  | 7.89 ± 3.12 <sup>a</sup>   | 2.09 ± 0.95 <sup>c</sup>   | 0.002          |
| <i>Ileibacterium</i>           | 1.44 ± 2.28               | 0.11 ± 0.19                | 0.01 ± 0.02                | 0.051          |
| <i>Lachnospiraceae_UCG-006</i> | 0.25 ± 0.14 <sup>b</sup>  | 0.13 ± 0.08 <sup>b</sup>   | 1.11 ± 1.02 <sup>a</sup>   | 0.001          |
| <i>Odoribacter</i>             | 1.61 ± 0.99 <sup>b</sup>  | 2.86 ± 1.17 <sup>a</sup>   | 0.36 ± 0.11 <sup>c</sup>   | 0.001          |
| <i>Oscillibacter</i>           | 3.01 ± 2.17               | 1.95 ± 1.85                | 1.32 ± 0.58                | 0.127          |
| <i>Parabacteroides</i>         | 0.50 ± 0.28 <sup>b</sup>  | 0.75 ± 0.30 <sup>b</sup>   | 2.75 ± 1.61 <sup>a</sup>   | 0.001          |

|                                        |                          |                           |                          |       |
|----------------------------------------|--------------------------|---------------------------|--------------------------|-------|
| <i>Rikenella</i>                       | 1.24 ± 0.56 <sup>a</sup> | 1.20 ± 0.39 <sup>a</sup>  | 0.37 ± 0.45 <sup>b</sup> | 0.007 |
| <i>Roseburia</i>                       | 1.43 ± 0.98 <sup>a</sup> | 1.44 ± 0.94 <sup>a</sup>  | 0.29 ± 0.14 <sup>b</sup> | 0.005 |
| <i>Ruminiclostridium</i>               | 3.37 ± 1.29 <sup>a</sup> | 2.60 ± 1.35 <sup>a</sup>  | 0.38 ± 0.30 <sup>b</sup> | 0.001 |
| <i>norank_f__Erysipelotrichaceae</i>   | 0.36 ± 0.64              | 0.07 ± 0.07               | 0.97 ± 1.44              | 0.115 |
| <i>norank_f__Lachnospiraceae</i>       | 4.33 ± 1.09 <sup>a</sup> | 3.09 ± 1.09 <sup>b</sup>  | 1.54 ± 0.73 <sup>c</sup> | 0.001 |
| <i>norank_o__Gastranaerophilales</i>   | 0.16 ± 0.14              | 0.89 ± 1.00               | 0.55 ± 0.77              | 0.072 |
| <i>unclassified_f__Lachnospiraceae</i> | 5.09 ± 2.04 <sup>a</sup> | 2.96 ± 0.98 <sup>b</sup>  | 2.21 ± 1.24 <sup>b</sup> | 0.004 |
| <i>unclassified_f__Ruminococcaceae</i> | 1.82 ± 0.73 <sup>a</sup> | 1.77 ± 1.72 <sup>ab</sup> | 0.94 ± 0.39 <sup>b</sup> | 0.020 |

N = 9. Data are expressed as mean ± SD. Means with different superscript letters differ significantly at  $p < 0.05$ .

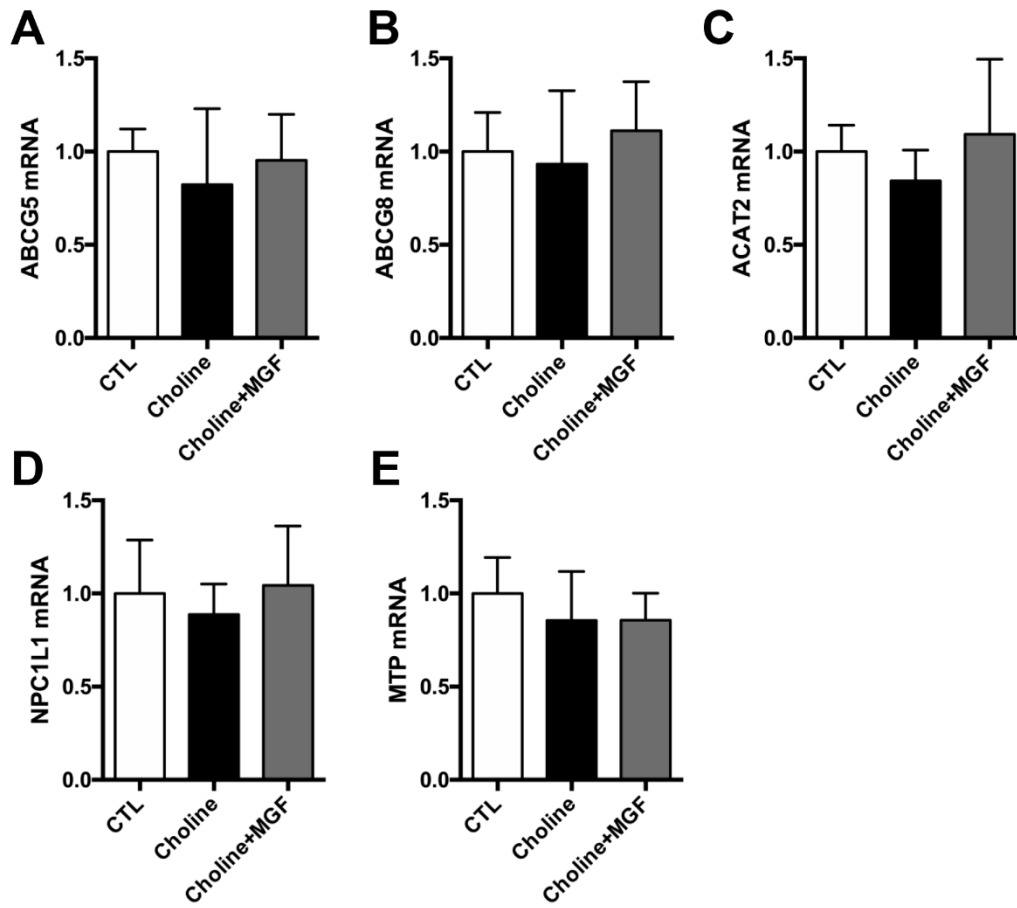

**Fig. S1** Relative expression of intestinal mRNA of (A) ATP-binding cassette sub-family G member 5 (ABCG5) and (B) member 8 (ABCG8), (C) acyl-coenzyme A:cholesterol acyltransferase 2 (ACAT2), (D) Niemann-Pick C1 like 1 (NPC1L1), and (E) microsomal-triacylglycerol-transport protein (MTP) in ApoE<sup>-/-</sup> mice fed a control diet (CTL), a high-choline diet with 1% free choline (Choline), or a high-choline diet with 1% free choline plus 0.5% mangiferin (Choline + MGF) for 15 weeks (n= 8). Data are expressed as mean with SD. Means with different superscript letters differ significantly at  $p < 0.05$ .

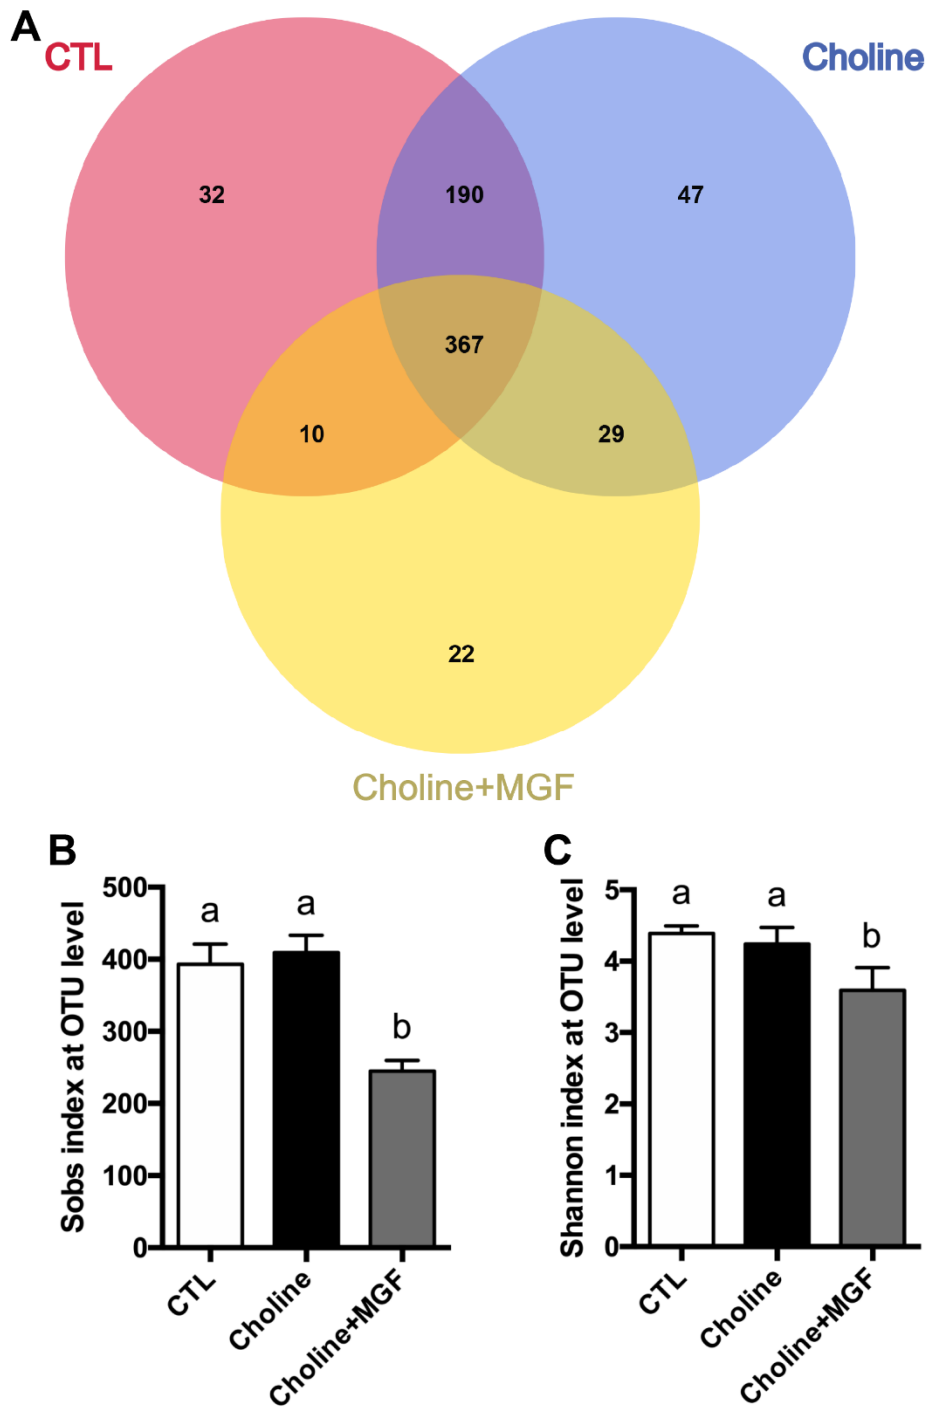

**Fig. S2 (A)** Venn diagram of the number of operational taxonomic units (OTUs) in the gut microbiota of ApoE<sup>-/-</sup> mice fed a control diet (CTL), a high-choline diet with 1% free choline (Choline), or a high-choline diet with 1% free choline plus 0.5% mangiferin (Choline + MGF) for 15 weeks (n = 9). **(B)**  $\alpha$ -Diversity evaluated by Sobs index and **(C)** Shannon index. Data are expressed as mean with SD. Means with different superscript letters differ significantly at  $p < 0.05$ .

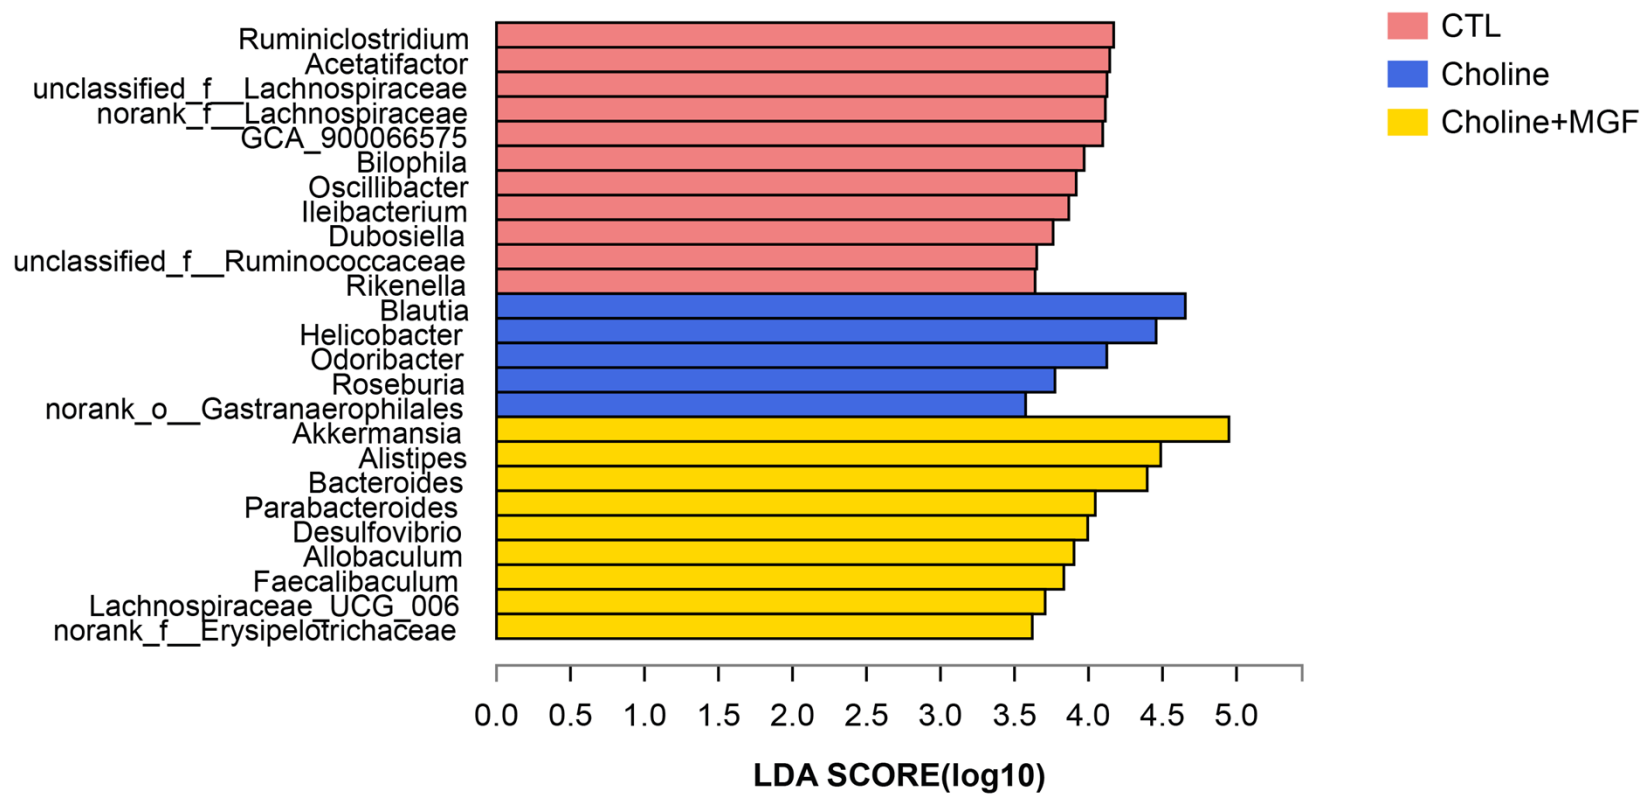

**Fig. S3** 25 key genera were identified through linear discriminant analysis (LDA) effect size (LEfSe) with LDA score at 3.5 as a threshold.
