# Supplementary material for: Mangiferin alleviates trimethylamine-N-oxide (TMAO)-induced atherogenesis and modulates gut microbiota in mice
Source: Royal Society of Chemistry journal article supplement (doi:10.1039/d3fo02791k), 2023-01-01
Supplement: d3fo02791k2.xlsx [file d3fo02791k2.xlsx]

## Sheet: Body & organ weight
	Initial Body weight (g)	Final body weight (g)	Liver (% BW)	Kidneys (%BW)	Perirenal fat (% BW)	Gonadal fat (%BW)	Heart (% BW)	Liver cholesterol (mg/g liver)
CTL1	19.3	23.7	4.31688	1.12278	1.11055	2.02447	0.512236	8.72406
CTL2	20	22.8	4.39912	0.617982	1.09912	1.0114	0.569737	10.1904
CTL3	19.3	22.6	3.91549	1.01062	1.0323	2.20973	0.482301	8.88306
CTL4	19.3	23.6	3.72754	1.08305	0.722881	2.01271	0.563136	8.15739
CTL5	21.1	23.9	3.46192	1.05607	0.81841	1.75188	0.641423	10.4851
CTL6	18.9	23.1	4.29307	1.09091	0.741991	2.1684	0.523377	9.08853
CTL7	20.9	22.8	3.88377	1.11404	0.957018	1.6886	1.17544	10.1074
CTL8	21.7	26.5	4.72717	1.07698	1.06755	1.73925	0.97283	7.84256
CTL9	23	26.6	4.48647	1.06729	1.02105	2.38609	0.939098	10.6504
Choline1	20.7	23.4	4.23547	1.1047	0.680342	1.35598	0.569231	9.55391
Choline2	21	24.1	3.88631	1.03278	0.761826	1.65851	0.518672	10.5524
Choline3	20	23.4	4.16368	1.09915	0.890598	1.20983	0.597009	14.292
Choline4	19.1	21.4	3.71215	1.0729	1.19299	2.34813	1.10841	12.9268
Choline5	20	21.6	3.98935	1.19167	0.810185	1.39352	0.974074	8.85106
Choline6	21.6	23.6	3.79025	1.12034	0.905508	2.00975	0.89661	14.0297
Choline7	20.2	20.9	3.8244	1.18038	0.72201	1.03493	1.17656	10.2718
Choline8	19.1	24.9	4.35703	1.10602	1.16908	2.72129	0.965462	12.4873
Choline9	20.3	27.2	3.6114	1.05404	2.38897	4.19632	0.822426	13.7941
MGF1	19.2	22.8	4.22895	1.16535	0.376316	0.780263	0.511404	9.6177
MGF2	22.1	24	4.49	1.22208	0.6225	1.16333	0.482083	8.14506
MGF3	20.8	24	4.405	1.19	0.8125	2.05125	0.500417	10.9849
MGF4	20.8	21.7	3.83364	1.13871	0.595392	1.00691	0.537788	8.5511
MGF5	19.1	20.7	4.02899	1.21304	0.722705	1.75314	0.562319	9.78099
MGF6	21.1	21.3	3.96291	1.30329	0.560094	1.17512	0.676056	11.0057
MGF7	19.7	24.2	3.97645	1.20289	0.503306	1.08182	1.25785	8.68151
MGF8	20.8	23	3.96435	1.30478	0.423478	0.855652	1.40348	8.81951
MGF9	19.2	22.7	4.14934	1.12335	0.430396	0.865639	1.23128	8.30587

## Sheet: Plasma data
	Plasma TMAO (umol/L)	Plasma Choline (umol/L)	TC (mg/dL)	TG (mg/dL)	HDL-C (mg/dL)	LPS (ng/mL)	IL-1beta (pg/mL)	TNF-α (pg/mL)
CTL1	17.91	59.39	603.13	134.67	79.2	5.76	102.43	614.05
CTL2	18.11	68.31	695.5	149	41	7.98	135.38	592.23
CTL3	17.73	79.24	546.88	114	66.73	3.7	89.53	590.49
CTL4	11.94	74.69	496.88	132.67	47.67	4.06	137.25	542.26
CTL5	13.49	60.87	524.01	107	101	4.18	105.35	619.97
CTL6	7.57	71.38	543.75	103.33	38.87	3.55	131.44	580.42
CTL7	10.83	57.21	703.13	111.33	108.53	5.88	105.82	560.13
CTL8	7.77	62.13	718.75	169.33	110	4.87	81.91	547.66
CTL9	11.6	67.93	653.13	127.33	47.67	1.96	107.98	581.05
Choline1	32.19	80.08	634.38	95.33	60.13	8.35	158.09	716.91
Choline2	39.42	90.03	553.13	69.33	77.73	5.66	183.74	710.17
Choline3	36.85	132.04	746.88	103.33	60.13	3.46	156.92	756.06
Choline4	45.02	79.47	837.5	104.67	50.6	6.13	236.83	673.56
Choline5	48.92	78.27	637.5	102	81.4	9.71	148.61	637.67
Choline6	13.61	60.86	881.25	152	84.33	6.04	169.5	985.98
Choline7	26.82	56.54	979.9	154	102	3.87	220.11	714.13
Choline8	17.75	68.92	579.02	78	52	9.25	175.95	923.45
Choline9	25.07	96.8	1159.38	182.67	126.13	6.55	164.91	663.52
MGF1	37.14	97.99	559.38	92	85.07	3.89	152.48	575.5
MGF2	30.26	89.57	684.38	124	60.87	3.62	97.27	891.15
MGF3	43.74	119.03	400	80.67	91.67	3.92	91.29	611.75
MGF4	19.27	78.49	631.25	77.33	73.33	4.38	156.54	677.35
MGF5	18.51	76.46	700	133.33	89.47	3.17	82.78	402.63
MGF6	20.94	89.88	775	80.67	121	4.23	63.11	672.9
MGF7	19.41	77.97	728.13	70.67	87.27	3.86	105.28	412.65
MGF8	38.36	82.98	628.13	63.33	90.93	4.56	155.25	752.78
MGF9	21.64	79.09	450	108	105.6	3.16	61.23	748.23

## Sheet: Fecal data
	Fecal neutral sterols (mg/d/mouse)					Fecal acidic sterols (mg/d/mouse)					Fecal SCFAs (μg/d/mouse)
	coprostanol	coprostanone	cholesterol	dihydrocholesterol	Total neutral sterols	lithocholic acid	deoxycholic acid	chenodeoxycholic acid	cholic acid	Total acidic sterols	Acetic acid	Propionic acid	Butyric acid	Valeric acid	Total SCFAs
CTL-cage 1.1	0.00873229	0.000198752	0.158825	0.0201726	0.187929	0.0977092	0.264988	0.0991485	0.0887616	0.550608	156.121	31.9023	3.14757	3.84926	195.02
CTL-cage 1.2	0.00819356	9.90654e-05	0.159295	0.0197085	0.187296	0.131024	0.280088	0.105162	0.0955447	0.611819	129.311	28.8708	2.97935	3.70258	164.864
CTL-cage 2.1	0.034871	0.00059387	0.11017	0.0242726	0.169908	0.074875	0.196814	0.0941462	0.0725494	0.438385	160.897	33.9926	2.22011	2.90382	200.014
CTL-cage 2.2	0.0373375	0.000637493	0.115103	0.0258768	0.178955	0.0860799	0.206079	0.0736221	0.0638636	0.429644	163.858	32.9812	2.1578	2.54525	201.542
CTL-cage 3.1	0.0291148	0.000533419	0.107429	0.0255557	0.162633	0.0863657	0.17071	0.0676423	0.0561887	0.380907	143.655	30.5319	2.00231	2.51834	178.708
CTL-cage 2.2	0.0300774	0.000473254	0.108297	0.0261119	0.164959	0.0912878	0.222987	0.0938319	0.0751708	0.483278	169.772	37.1555	2.29312	3.17124	212.391
Choline-cage1.1	0.0553094	0.00089629	0.100178	0.025986	0.182369	0.0760525	0.105972	0.0423397	0.0373459	0.26171	126.647	24.5443	2.05753	2.0455	155.295
Choline-cage1.2	0.0574332	0.000889595	0.106292	0.0274135	0.192029	0.0668311	0.12359	0.0534502	0.0635513	0.307423	134.416	24.9503	1.70673	2.06504	163.138
Choline-cage2.1	0.0437626	0.000755304	0.10006	0.0267521	0.17133	0.0876268	0.0976777	0.0585985	0.042926	0.286829	85.7153	16.1426	1.90868	1.59152	105.358
Choline-cage2.2	0.0465096	0.0011628	0.105439	0.0280988	0.18121	0.0791615	0.107874	0.0482011	0.0423306	0.277567	98.6522	17.288	1.91577	1.71206	119.568
Choline-cage3.1	0.020025	0.000318449	0.0945191	0.021274	0.136137	0.0720421	0.173651	0.0605454	0.0656188	0.371858	98.4902	17.9522	2.25254	1.66359	120.359
Choline-cage3.2	0.0209332	0.000384169	0.100383	0.0226594	0.14436	0.0682736	0.193555	0.0817108	0.0570921	0.400631	103.381	18.797	2.10854	2.01834	126.305
MGF-cage1.1	0.0642801	0.000533721	0.350889	0.0369402	0.452643	0.287	0.228721	0.114573	0.209968	0.840261	102.956	24.4474	1.47531	2.75735	131.636
MGF-cage1.2	0.0633807	0.000552717	0.335952	0.0363873	0.436273	0.2397	0.0979485	0.0581448	0.0751731	0.470967	111.71	26.2447	1.66152	2.87364	142.489
MGF-cage2.1	0.0271527	0.000357287	0.28373	0.0288841	0.340124	0.252253	0.189213	0.0882479	0.178575	0.708289	111.693	28.9139	1.24296	2.75578	144.606
MGF-cage2.2	0.0286354	0.000274549	0.297584	0.0305225	0.357016	0.164619	0.142305	0.0673381	0.097499	0.471761	126.813	32.5535	1.50235	3.05494	163.924
MGF-cage3.1	0.0636913	0.000743562	0.146931	0.0272711	0.238637	0.196369	0.0651073	0.0275389	0.0298152	0.31883	145.511	41.1011	1.8601	3.33954	191.812
MGF-cage3.2	0.0671967	0.000931709	0.164665	0.0300706	0.262864	0.12733	0.0963026	0.0617685	0.0621656	0.347567	127.777	37.1189	1.71577	3.10797	169.72

## Sheet: Aorta data
	Thoracic aorta		Aortic sinus
	Aorta area	Plauqe area	Aorta lumen area (μm^2)	Plaque area (μm^2)	Collagen area (μm^2)	CD68 area (μm^2)
CTL1	89085	20	1.2981e+06	343553	235192	13724.3
CTL2	105589	3033	1.55385e+06	477997	111303	94026.1
CTL3	91255	4153	1.19611e+06	276752	71731.8	29177
CTL4	97710	674	2.07532e+06	491231	98422.5	70857.3
CTL5	94749	2013	1.15927e+06	283282	166828	48655.7
CTL6	93006	2756	1.25615e+06	388320	220593	67465.7
CTL7	107422	3042	1.82646e+06	486533	146612	51488.3
CTL8	104766	1264	1.36505e+06	350830	108371	44214.7
CTL9	108473	863	1.47142e+06	363210	150250	68597.4
Choline1	92719	4747	1.89886e+06	685902	278392	115768
Choline2	102839	8842	1.4786e+06	561797	294877	94890.3
Choline3	95520	6623	1.58057e+06	578464	271704	173248
Choline4	105633	10909	2.23528e+06	930062	166303	105634
Choline5	97985	3286	1.61219e+06	493104	153395	106365
Choline6	104420	8227	1.35599e+06	442726	146632	163728
Choline7	92006	15623	1.57749e+06	528800	194561	144400
Choline8	103911	2200	2.24373e+06	628395	153680	105809
Choline9	96667	8563	1.6455e+06	539078	175802	122435
MGF1	101305	3981	2.2462e+06	455147	145069	43988.3
MGF2	99030	4760	1.36266e+06	348062	140504	35716.7
MGF3	87816	1451	1.31221e+06	323769	128152	50274.3
MGF4	90614	5615	1.76519e+06	572963	288282	218933
MGF5	89582	7634	1.38868e+06	533892	298724	133604
MGF6	109487	15183	1.55499e+06	483244	469129	151608
MGF7	109081	6793	1.48845e+06	472020	184376	34663.9
MGF8	110581	2855	1.18901e+06	258309	191996	5555.56
MGF9	89040	1872	1.51481e+06	511924	154180	82654.3

## Sheet: Liver mRNA
Hepatic genes	beta-Actin		FMO3		CYP7A1		FXR		SHP		HMG-CoA-R		LDL-R		SREBP2
	Ct Mean	Ct SD	Ct Mean	Ct SD	Ct Mean	Ct SD	Ct Mean	Ct SD	Ct Mean	Ct SD	Ct Mean	Ct SD	Ct Mean	Ct SD	Ct Mean	Ct SD
CTL1	19.8981	0.0104632	22.9359	0.0156476	21.495	0.00246947	24.268	0.0160617	25.9452	0.0228578	26.6431	0.0417908	26.8241	0.0129576	28.5865	0.0947084
CTL2	19.7696	0.0284832	22.5616	0.0295689	22.5652	0.0359617	23.937	0.0110256	26.0743	0.0310255	27.0736	0.0946436	27.2023	0.0320862	28.8702	0.140305
CTL3	19.8489	0.00427268	22.8194	0.0224585	21.9261	0.0361843	24.3015	0.0528501	25.9804	0.00762824	27.0429	0.11864	26.9842	0.00178568	29.1153	0.00524509
CTL4	19.8963	0.00819335	22.2953	0.0362288	22.3722	0.0010358	24.2646	0.0198286	27.5468	0.0299168	26.6434	0.0503402	26.3322	0.00926826	28.8732	0.0749526
CTL5	19.9247	0.00375208	22.2727	0.020074	22.3011	0.033298	24.2769	0.0284589	27.4112	0.0701512	26.549	0.0859701	26.417	0.0354829	28.8034	0.0153455
CTL6	19.9573	0.00859256	22.1065	0.014508	21.7458	0.00457209	24.0158	0.0273098	27.9054	0.0586293	26.818	0.0363731	26.1966	0.133044	29.3513	0.0798416
CTL7	20.0122	0.0313276	22.0523	0.0182573	22.4991	0.0214511	24.1873	0.0136677	28.7992	0.0401912	27.1398	0.0263859	26.6664	0.104002	28.8685	0.140239
CTL8	19.9626	0.0193471	22.5501	0.0134371	21.5527	0.0194186	24.1004	0.0136529	27.7147	0.0150056	27.0143	0.0291993	26.7387	0.0395155	29.1985	0.217827
Choline1	20.2755	0.0227633	22.6735	0.00203788	22.5497	0.0196748	24.365	0.0189506	26.5584	0.00169397	26.5273	0.0007256	26.7916	0.141353	28.933	0.0415291
Choline2	20.296	0.0260488	23.8385	0.0379659	23.9863	0.0137473	25.0196	0.0184273	27.7419	0.114621	28.5638	0.0203087	27.8482	0.161899	29.7903	0.0897101
Choline3	20.6544	0.00195696	22.9327	0.011646	23.4353	0.00452489	24.6311	0.0143286	28.3696	0.0848143	27.5324	0.0594102	27.2826	0.0898018	29.7009	0.0667053
Choline4	20.337	0.0900229	23.2466	0.0263199	22.7442	0.0358268	24.512	0.0197193	27.4984	0.0520854	27.2864	0.0506666	27.3245	0.089323	29.5464	0.138645
Choline5	20.792	0.0220836	22.3995	0.015212	22.5925	0.0132523	24.7569	0.012988	28.3398	0.120162	27.3765	0.133821	26.8823	0.046108	29.6134	0.139495
Choline6	20.5745	0.0152336	21.9439	0.0326142	24.0607	0.0390003	24.1247	0.0239151	28.1642	0.0243656	26.8043	0.104582	26.9729	0.0155033	29.1076	0.0362409
Choline7	20.3389	0.0120614	21.9519	0.027736	24.7461	0.0197706	24.3168	0.0164541	27.9401	0.00656142	26.8653	0.0142922	26.915	0.0153455	28.9507	0.0204854
Choline8	20.4532	0.0202237	22.5652	0.00377636	22.0394	0.0234822	24.4551	0.00342165	27.2683	0.00453433	26.5676	0.0641522	26.9017	0.118222	29.0921	0.138341
MGF1	20.7561	0.0130905	24.5148	0.00989945	25.1363	0.0569987	25.2252	0.0468659	26.4236	0.076219	27.0414	0.0847833	27.5293	0.104129	29.6635	0.0194159
MGF2	20.6802	0.0253758	25.1949	0.0435508	25.4267	0.0315865	25.486	0.0320222	27.3464	0.0636492	27.6292	0.105854	27.7424	0.0273112	29.7423	0.152062
MGF3	20.746	0.0433863	23.9971	0.0202251	24.377	0.0188224	25.2008	0.0117674	27.076	0.0425137	26.9372	0.0497576	27.2779	0.00845095	30.0005	0.240995
MGF4	21.369	0.027736	24.5892	0.0426256	24.6317	0.0154264	25.6708	0.0199796	29.7875	0.019834	28.4886	0.0852742	28.2876	0.0407145	30.5335	0.0911559
MGF5	20.964	0.00442508	25.6442	0.0632607	23.7421	0.0170813	25.6243	0.0276834	28.6738	0.115157	29.1112	0.169966	28.4748	0.138505	30.4426	0.0579415
MGF6	21.4315	0.0411475	24.5567	0.0731669	23.1517	0.0278884	25.6768	0.0141452	29.9628	0.00883128	28.3805	0.104888	28.2473	0.0136596	30.5485	0.0287583
MGF7	21.5736	0.0112778	24.8314	0.0282755	24.1537	0.0322393	25.86	0.0445745	29.8714	0.0342165	28.2354	0.0357985	28.496	0.05664	30.4583	0.24001
MGF8	21.9499	0.0301124	24.2263	0.0201078	24.1046	0.00474203	25.9491	0.0244061	29.2427	0.0176086	28.6417	0.0606335	29.0309	0.00476495	31.369	0.111564

## Sheet: Intestine mRNA
Intestinal genes	beta-Actin		NPC1L1		MTP		ACAT2		ABCG5		ABCG8
	Ct Mean	Ct SD	Ct Mean	Ct SD	Ct Mean	Ct SD	Ct Mean	Ct SD	Ct Mean	Ct SD	Ct Mean	Ct SD
CTL1	18.1101	0.0280974	24.719	0.0782488	21.2857	0.0156759	25.4292	0.20111	21.6095	0.0235105	22.5334	0.0346629
CTL2	18.4947	0.00239124	25.3699	0.128983	21.2236	0.126753	25.6101	0.011847	21.755	0.0546102	23.0508	0.0525615
CTL3	18.247	0.00901336	24.8918	0.125654	21.3331	0.146072	25.9647	0.0449993	21.8314	0.070978	22.558	0.20019
CTL4	18.8229	0.00638744	24.9139	0.0414428	21.3467	0.0382113	25.6525	0.0578578	21.9537	0.0377906	22.8251	0.0892906
CTL5	17.7662	0.0049713	23.6189	0.00250993	20.9177	0.00420794	24.7868	0.18254	21.1507	0.0565145	21.834	0.0891827
CTL6	18.0178	0.0394697	24.732	1.61844e-05	21.0654	0.0367251	25.4116	0.23589	21.5	0.0748137	22.5794	0.000175331
CTL7	18.025	0.0122421	23.6617	0.110673	20.7968	0.0997511	24.9722	0.0544537	21.3102	0.00896345	21.8723	0.0649601
CTL8	18.328	0.0108112	24.6252	0.0481971	21.2112	0.0778159	25.2493	0.0781274	21.6192	0.0726854	22.7903	0.0135558
Choline1	17.9237	0.016763	23.9682	0.0177772	21.1554	0.0328718	25.2955	0.0508878	21.7344	0.0690332	22.6761	0.0046665
Choline2	17.8557	0.0186431	24.4753	0.0197733	20.9364	0.0139563	25.0856	0.0159942	21.7105	0.0728864	21.9731	0.142048
Choline3	17.523	0.0310713	24.0449	0.10609	20.8557	0.0972574	24.8718	0.0268324	20.9444	0.010594	21.4905	0.0719315
Choline4	17.961	0.0181036	24.4622	0.0121531	21.0251	0.0149395	25.4293	0.0102676	21.8062	0.0124836	22.7557	0.110839
Choline5	18.394	0.0569367	24.6067	0.0660485	21.171	0.0431408	25.0876	0.18202	21.7391	0.0352536	21.9929	0.0617745
Choline6	18.5315	0.173159	24.5662	0.157416	20.8511	0.0843004	26.1537	0.0307234	21.0174	0.220287	22.1141	0.0745372
Choline7	17.8638	0.0344175	24.5336	0.0168628	21.1926	0.0729066	25.3593	0.0273948	21.9642	0.0287678	22.4413	0.0989824
Choline8	18.4242	0.0604231	25.0883	0.184737	21.9908	0.0356164	25.8634	0.00604082	22.8994	0.0713152	24.1763	0.0309729
MGF1	18.0501	0.0498965	24.2308	0.100999	20.9716	0.00399754	25.2948	0.345106	21.4074	0.0315231	22.2141	0.210583
MGF2	18.4455	0.118467	24.8976	0.0572118	21.363	0.116141	25.864	0.184467	21.6033	0.16347	22.2192	0.0607023
MGF3	18.1239	0.0812295	23.9164	0.0971279	21.4535	0.0292384	25.363	0.0222846	21.3679	0.0867348	22.1654	0.0192338
MGF4	18.3826	0.0408656	24.5994	0.0885192	21.7015	0.0322069	24.9019	0.0457371	21.9626	0.0267771	22.4417	0.0155734
MGF5	18.4731	0.00429965	24.6519	0.0322015	21.6383	0.038941	25.0569	0.00769703	22.0619	0.0436506	22.4594	0.126434
MGF6	19.5119	0.0217289	25.4602	0.0299735	22.1716	0.00796677	25.4205	0.0456858	22.4358	0.0196613	23.3385	0.221984
MGF7	17.8906	0.0255835	24.7888	0.0750079	20.8681	0.0378593	24.9593	0.0453446	21.8525	0.129734	22.492	0.105675
MGF8	18.5057	0.0322353	24.2226	0.294876	21.2857	0.191979	26.3036	0.0471424	21.4491	0.0176221	22.1643	0.0137338

## Sheet: WB data
		FMO3				CYP7A1				FXR				SHP				HMG-CoA-R				LDL-R				SREBP2
		FMO3 Adjusted Intensity	β-acting Adjusted Intensity	FMO3/Actin	normalized with CTL	CYP7A1 Adjusted Intensity	β-acting Adjusted Intensity	CYP7A1/Actin	normalized with CTL	FXR Adjusted Intensity	β-Actin Adjusted Intensity	FXR/Actin	normalized with CTL	SHP Adjusted Intensity	β-Actin Adjusted Intensity	SHP/Actin	normalized with CTL	HMG Adjusted Intensity	β-Actin Adjusted Intensity	HMG/Actin	normalized with CTL	LDLR Adjusted Intensity	β-Actin Adjusted Intensity	LDL-R/Actin	normalized with CTL	SREBP2 Adjusted Intensity	β-Actin Adjusted Intensity	SREBP2/Actin	normalized with CTL
Gel 1	CTL1	1.33173e+07	4.65284e+06	2.8622	1.28888	8.37514e+06	4.61956e+06	1.81297	1.15642	3.48618e+06	4.76462e+06	0.731681	0.882337	8.29568e+06	4.76462e+06	1.7411	1.04186	2.93389e+06	2.37266e+06	1.23654	1.23907	3.26471e+06	2.37266e+06	1.37597	0.94288	2.93152e+06	4.76462e+06	0.615268	0.743415
	Choline1	1.26127e+07	4.1185e+06	3.06244	1.37905	4.46432e+06	4.08075e+06	1.09399	0.697816	2.82727e+06	2.18727e+06	1.2926	1.55875	5.54381e+06	2.18727e+06	2.53458	1.51667	2.57312e+06	1.89203e+06	1.35998	1.36275	5.74185e+06	1.89203e+06	3.03475	2.07956	3.02954e+06	2.18727e+06	1.38508	1.67356
	MGF1	1.35842e+07	6.21554e+06	2.18553	0.984169	8.21935e+06	6.07349e+06	1.35332	0.863227	3.27855e+06	2.76203e+06	1.18701	1.43142	4.40645e+06	2.76203e+06	1.59537	0.954652	3.31918e+06	4.86947e+06	0.681631	0.683024	5.01759e+06	4.86947e+06	1.03042	0.706093	2.22695e+06	2.76203e+06	0.806273	0.974203
Gel 2	CTL2	9.84328e+06	4.25774e+06	2.31186	1.04106	9.08304e+06	4.21764e+06	2.15358	1.37368	3.41732e+06	3.98597e+06	0.857337	1.03387	6.08449e+06	3.98597e+06	1.52648	0.913427	3.28496e+06	3.14382e+06	1.0449	1.04703	5.5963e+06	3.14382e+06	1.7801	1.21981	3.60505e+06	3.98597e+06	0.904435	1.09281
	Choline2	1.58858e+07	4.90113e+06	3.24125	1.45957	6.51624e+06	4.88383e+06	1.33425	0.851065	3.11226e+06	2.50704e+06	1.24141	1.49702	4.92176e+06	2.50704e+06	1.96318	1.17475	2.99098e+06	2.51746e+06	1.18809	1.19052	5.05543e+06	2.51746e+06	2.00815	1.37608	2.61355e+06	2.50704e+06	1.04249	1.25961
	MGF2	1.37852e+07	5.82801e+06	2.36533	1.06514	5.45953e+06	5.67233e+06	0.962484	0.613931	3.06241e+06	3.22091e+06	0.950793	1.14656	7.23968e+06	3.22091e+06	2.24772	1.34501	2.55025e+06	3.47289e+06	0.734332	0.735832	3.37242e+06	3.47289e+06	0.97107	0.665425	1.96941e+06	3.22091e+06	0.611445	0.738796
Gel 3	CTL3	5.384e+06	5.00534e+06	1.07565	0.484378	6.05096e+06	4.64169e+06	1.30361	0.831523	2.86527e+06	3.48375e+06	0.822466	0.991815	6.39348e+06	3.48375e+06	1.83523	1.09818	2.22493e+06	2.97728e+06	0.747305	0.748831	4.17567e+06	2.97728e+06	1.40251	0.96107	2.88968e+06	3.48375e+06	0.829473	1.00224
	Choline3	1.12493e+07	4.34932e+06	2.58644	1.16471	6.17585e+06	4.45823e+06	1.38527	0.883609	3.33802e+06	3.47236e+06	0.961312	1.15925	5.63718e+06	3.47236e+06	1.62345	0.971453	3.8024e+06	3.38841e+06	1.12218	1.12447	5.47097e+06	3.38841e+06	1.61461	1.10641	2.71443e+06	3.47236e+06	0.781725	0.944542
	MGF3	2.2881e+07	5.63223e+06	4.06251	1.8294	8.832e+06	5.67388e+06	1.55661	0.992897	3.38871e+06	2.75781e+06	1.22877	1.48178	6.21528e+06	2.75781e+06	2.2537	1.34859	2.79886e+06	2.76847e+06	1.01098	1.01304	4.37751e+06	2.76847e+06	1.5812	1.08351	2.5839e+06	2.75781e+06	0.936941	1.13209
Gel 4	CTL4	1.21351e+07	4.4198e+06	2.74561	1.23638	6.17387e+06	4.26219e+06	1.44852	0.923954	2.91078e+06	2.38972e+06	1.21804	1.46884	4.69935e+06	2.38972e+06	1.96649	1.17673	2.82001e+06	2.43883e+06	1.15629	1.15866	4.79586e+06	2.43883e+06	1.96646	1.34751	3.0011e+06	2.38972e+06	1.25584	1.5174
	Choline4	1.3044e+07	3.69843e+06	3.5269	1.5882	4.5566e+06	3.74059e+06	1.21815	0.77701	2.73547e+06	2.81032e+06	0.973368	1.17379	6.47313e+06	2.81032e+06	2.30335	1.3783	2.79284e+06	2.84196e+06	0.982715	0.984723	4.0684e+06	2.84196e+06	1.43155	0.980965	2.72016e+06	2.81032e+06	0.96792	1.16952
	MGF4	1.43352e+07	6.86865e+06	2.08705	0.939823	1.03283e+07	6.77102e+06	1.52537	0.972976	3.94575e+06	4.51388e+06	0.874137	1.05412	7.07346e+06	4.51388e+06	1.56704	0.937703	3.21335e+06	3.85337e+06	0.833905	0.835609	5.15988e+06	3.85337e+06	1.33906	0.917587	2.46675e+06	4.51388e+06	0.546481	0.660302
Gel 5	CTL5	1.33205e+07	4.71082e+06	2.82764	1.27332	7.58398e+06	4.6205e+06	1.64138	1.04697	2.97917e+06	4.83993e+06	0.61554	0.742281	7.34616e+06	4.83993e+06	1.51782	0.908249	2.85777e+06	3.58439e+06	0.797284	0.798913	5.23053e+06	3.58439e+06	1.45925	0.999952	2.77042e+06	4.83993e+06	0.572408	0.691629
	Choline5	1.74432e+07	5.69537e+06	3.0627	1.37917	7.11547e+06	5.62492e+06	1.26499	0.806888	3.63371e+06	2.41626e+06	1.50386	1.81351	3.77865e+06	2.41626e+06	1.56384	0.935787	2.71841e+06	2.31471e+06	1.1744	1.1768	5.28646e+06	2.31471e+06	2.28385	1.56501	3.04859e+06	2.41626e+06	1.2617	1.52449
	MGF5	8.75058e+06	4.5807e+06	1.91032	0.860237	6.35937e+06	4.52838e+06	1.40433	0.89577	2.97912e+06	2.45772e+06	1.21215	1.46173	7.12113e+06	2.45772e+06	2.89745	1.7338	3.25001e+06	3.23507e+06	1.00462	1.00667	3.50716e+06	3.23507e+06	1.08411	0.742882	2.369e+06	2.45772e+06	0.963899	1.16466
Gel 6	CTL6	1.19709e+07	5.61044e+06	2.13368	0.960821	6.93956e+06	5.47668e+06	1.26711	0.808239	2.44513e+06	3.45284e+06	0.708149	0.853959	5.37544e+06	3.45284e+06	1.55681	0.931581	2.4792e+06	3.30039e+06	0.751186	0.75272	4.15081e+06	3.30039e+06	1.25767	0.86182	2.55403e+06	3.45284e+06	0.739689	0.89375
	Choline6	1.73585e+07	6.10442e+06	2.84359	1.2805	7.80649e+06	6.04043e+06	1.29237	0.824354	3.14754e+06	3.61193e+06	0.87143	1.05086	7.51291e+06	3.61193e+06	2.08003	1.24467	2.69222e+06	3.76647e+06	0.714786	0.716247	5.45579e+06	3.76647e+06	1.44851	0.992593	3.25054e+06	3.61193e+06	0.899946	1.08739
	MGF6	1.01849e+07	3.27202e+06	3.11273	1.4017	6.31277e+06	3.25669e+06	1.9384	1.23643	3.99933e+06	2.64914e+06	1.50967	1.82052	5.35759e+06	2.64914e+06	2.02239	1.21017	3.65476e+06	2.0673e+06	1.76789	1.7715	4.41754e+06	2.0673e+06	2.13686	1.46428	2.38344e+06	2.64914e+06	0.899702	1.08709
Gel 7	CTL7	7.06404e+06	5.25902e+06	1.34323	0.60487	8.19023e+06	5.15094e+06	1.59005	1.01423	2.6352e+06	3.55782e+06	0.740676	0.893184	5.57529e+06	3.55782e+06	1.56705	0.937707	3.38627e+06	2.69191e+06	1.25794	1.26051	2.98025e+06	2.69191e+06	1.10711	0.758647	3.05681e+06	3.55782e+06	0.85918	1.03813
	Choline7	9.45457e+06	5.07194e+06	1.86409	0.839423	5.88985e+06	4.99898e+06	1.17821	0.751533	2.53995e+06	3.01515e+06	0.842395	1.01585	8.0528e+06	3.01515e+06	2.67078	1.59817	2.73658e+06	3.72891e+06	0.733881	0.735381	5.13322e+06	3.72891e+06	1.3766	0.943314	2.69694e+06	3.01515e+06	0.894464	1.08076
	MGF7	1.29956e+07	4.65592e+06	2.7912	1.25691	6.97874e+06	4.62388e+06	1.50928	0.962711	4.41686e+06	3.14094e+06	1.40622	1.69576	4.61785e+06	3.14094e+06	1.47021	0.879758	2.70334e+06	2.71334e+06	0.996313	0.998349	5.91068e+06	2.71334e+06	2.17837	1.49273	2.43426e+06	3.14094e+06	0.775008	0.936426
Gel 8	CTL8	1.47606e+07	5.98658e+06	2.46562	1.1103	7.67132e+06	5.79095e+06	1.32471	0.84498	3.28431e+06	3.49343e+06	0.94014	1.13372	5.79295e+06	3.49343e+06	1.65824	0.992274	3.06129e+06	3.08523e+06	0.992241	0.994268	4.08952e+06	3.08523e+06	1.32552	0.908309	2.95089e+06	3.49343e+06	0.844696	1.02063
	Choline8	1.34816e+07	4.58399e+06	2.94103	1.32438	3.51249e+06	4.6912e+06	0.74874	0.477592	3.06272e+06	3.50917e+06	0.872776	1.05248	6.97083e+06	3.50917e+06	1.98646	1.18868	2.5431e+06	3.5859e+06	0.709192	0.710641	5.2061e+06	3.5859e+06	1.45182	0.994861	2.40427e+06	3.50917e+06	0.68514	0.827841
	MGF8	1.1272e+07	4.41632e+06	2.55235	1.14935	9.87501e+06	4.29166e+06	2.30098	1.4677	3.24497e+06	2.71132e+06	1.19682	1.44325	5.48216e+06	2.71132e+06	2.02195	1.20991	3.22181e+06	2.46303e+06	1.30806	1.31074	4.72852e+06	2.46303e+06	1.91979	1.31554	2.83285e+06	2.71132e+06	1.04482	1.26244
			Average of CTL	2.22068			Average of CTL	1.56774			Average of CTL	0.829254			Average of CTL	1.67115			Average of CTL	0.997961			Average of CTL	1.45932			Average of CTL	0.827623

## Sheet: Phylum
Relative abundance of phylum (%)	p__Actinobacteria	p__Bacteroidetes	p__Cyanobacteria	p__Deferribacteres	p__Epsilonbacteraeota	p__Firmicutes	p__Patescibacteria	p__Proteobacteria	p__Tenericutes	p__Verrucomicrobia
CTL1	0.186107	23.8072	0.0700923	0	6.19471	64.7387	0.239281	4.66477	0.0169188	0.0314207
CTL2	0.388426	16.4614	0.111409	0.05721	4.81768	64.4636	0.213785	9.85216	0.0481768	3.47475
CTL3	0.174978	30.3773	0.124606	0	4.40892	59.4767	0.0636284	5.32623	0.00530237	0.00265118
CTL4	2.09191	18.0358	0.0941509	0.00294221	1.76827	73.9585	0.0294221	2.20078	0.00294221	1.79475
CTL5	0.187723	25.4338	0.292311	0.0455899	8.24908	62.6163	0.158224	2.90434	0.0563169	0.00268176
CTL6	0.214223	38.5438	0.267778	0.419131	3.13417	47.5597	0.0535556	2.65217	0.0861547	7.03674
CTL7	0.1605	42.4338	0.067904	0.0576155	6.47352	48.3621	0.0267501	2.27787	0.0596732	0.0432117
CTL8	0.37506	26.9523	0.0238477	0.00433595	8.69575	60.6404	0.125743	2.95061	0.0195118	0.136582
CTL9	0.135423	33.0539	0.44711	0	5.93065	55.5083	0.174115	2.28499	0.0859827	2.34733
Choline1	0.0980115	37.4578	0.413826	0.00217803	11.5741	44.8304	0.0522728	2.28693	0.0479167	3.17339
Choline2	0.404781	30.4672	0.44952	0.0106521	7.93796	56.3838	0.44952	2.40951	0.070304	1.35495
Choline3	0.218434	44.3164	0.848038	0.0813774	3.30221	43.5498	0.0728114	2.90389	0.0685284	4.60425
Choline4	0.133152	36.4898	1.796	0.123862	10.6521	46.9654	0.182696	3.52697	0.0681241	0.0061931
Choline5	0.0635471	32.2473	0.629694	0	10.0809	52.8336	0.196418	3.8706	0.028885	0.00577701
Choline6	0.0429789	32.4491	0.4083	0	7.22285	56.6462	0.312791	2.81512	0.0883456	0
Choline7	0.10665	30.7574	0.202191	0	10.074	56.0891	0.0733219	2.53294	0.00888751	0.0399938
Choline8	0.186981	25.0207	3.17066	0.00801346	2.84478	57.948	0.229719	6.97973	0.638406	2.97032
Choline9	0.0459289	46.0157	0.0790998	0	7.03733	44.625	0.096961	2.02853	0	0
MGF1	0.229712	35.6771	0.0717849	0.0179462	1.08754	26.3235	0.132802	2.66322	0	33.7963
MGF2	0.216124	31.6546	0.263872	0.0552875	2.58846	29.5461	0.163349	2.49548	0	33.0117
MGF3	0.313939	46.436	0.0597979	0.182384	1.07636	21.5183	0.056808	2.73575	0	27.6206
MGF4	0.198875	41.9966	0.146539	0	2.04893	48.3998	0.0628026	4.61861	0	2.5278
MGF5	0.437814	47.6245	0.113507	0.0097292	2.70472	37.4055	0.0291876	5.14675	0	6.52181
MGF6	0.49232	29.7091	1.13719	0.0416045	2.09063	53.285	0.0866761	8.89644	0	4.25753
MGF7	0.626521	40.5594	0.869918	0.164518	3.96872	29.3631	0.0743712	4.41044	0	19.954
MGF8	0.205509	49.9459	0.0216325	0.025238	1.15734	25.4579	0.0540813	3.69556	0	19.4368
MGF9	0.243828	41.6032	2.34407	0.141309	1.87581	24.3662	0.024937	4.21989	0	25.178

## Sheet: Family
Relative abundance of family (%)	f__Bifidobacteriaceae	f__Atopobiaceae	f__Eggerthellaceae	f__unclassified_o__Coriobacteriales	f__Nocardiaceae	f__Bacteroidaceae	f__Marinifilaceae	f__Muribaculaceae	f__Prevotellaceae	f__Rikenellaceae	f__Tannerellaceae	f__unclassified_o__Bacteroidales	f__Lentimicrobiaceae	f__LiUU-11-161	f__norank_o__Gastranaerophilales	f__Deferribacteraceae	f__Helicobacteraceae	f__Family_XI_o__Bacillales	f__Staphylococcaceae	f__Enterococcaceae	f__Lactobacillaceae	f__Streptococcaceae	f__Caldicoprobacteraceae	f__Christensenellaceae	f__Clostridiaceae_1	f__Clostridiales_vadinBB60_group	f__Defluviitaleaceae	f__Eubacteriaceae	f__Family_XIII	f__Lachnospiraceae	f__Peptococcaceae	f__Peptostreptococcaceae	f__Ruminococcaceae	f__unclassified_o__Clostridiales	f__Erysipelotrichaceae	f__Saccharimonadaceae	f__norank_o__Rhodospirillales	f__Desulfovibrionaceae	f__Geobacteraceae	f__Burkholderiaceae	f__Nitrosomonadaceae	f__Enterobacteriaceae	f__Anaeroplasmataceae	f__norank_o__Mollicutes_RF39	f__Akkermansiaceae	f__unclassified_k__norank_d__Bacteria
CTL1	0.0628414	0.0604244	0.0628414	0	0	1.75956	0.478561	14.6928	0.00483395	6.09078	0.700923	0.0797602	0	0	0.0700923	0	6.19471	0.00966791	0	0.00483395	0.355296	0.00483395	0	0.0797602	0.00725093	0.00483395	0	0	0.0531735	40.7647	0.435056	0.280369	21.4724	0.0531735	1.21332	0.239281	0	4.6551	0	0.00483395	0	0.00483395	0	0.0169188	0.0314207	0.0507565
CTL2	0.162597	0.168619	0.05721	0	0	0.213785	0.355304	11.6076	0.00903315	4.11912	0.11442	0.0421547	0	0	0.111409	0.05721	4.81768	0.0150553	0	0	0.520912	0.00903315	0	0.0993647	0.00903315	0.00903315	0	0	0.0963536	27.7288	0.292072	0.0782873	31.8328	0.0722652	3.70058	0.213785	0	9.84312	0	0	0.00903315	0	0.00301105	0.0451658	3.47475	0.111409
CTL3	0.100745	0.0185583	0.0556749	0	0	6.10568	1.43429	10.5146	0.0212095	11.2331	0.914658	0.153769	0	0	0.124606	0	4.40892	0.00530237	0	0.00530237	0.188234	0.0185583	0	0.0450701	0.0185583	0.0318142	0	0	0.071582	31.0348	0.410933	0.530237	25.7775	0.0530237	1.28582	0.0636284	0.00265118	5.30502	0	0.0185583	0	0	0	0.00530237	0.00265118	0.0397678
CTL4	1.14746	0.538425	0.406026	0	0	0.812051	0.750265	7.95575	0	8.2941	0.182417	0.041191	0	0	0.0941509	0.00294221	1.76827	0.27951	0	0.0853242	5.2548	0.41191	0	0.0794398	0.0764976	0.00588443	0	0	0.161822	33.6413	0.247146	1.07979	12.0572	0.0353066	20.5425	0.0294221	0	2.20078	0	0	0	0	0	0.00294221	1.79475	0.0205955
CTL5	0.0938615	0.0563169	0.0375446	0	0	2.02204	1.91477	10.6895	0.0134088	10.0995	0.587305	0.10727	0	0	0.292311	0.0455899	8.24908	0.00804527	0	0	0.254767	0.010727	0	0.0482716	0.0268176	0.383491	0	0	0.0482716	28.019	0.281584	0.217222	32.3098	0.0482716	0.960069	0.158224	0.010727	2.8668	0	0.0268176	0	0	0.0134088	0.0429081	0.00268176	0.0536351
CTL6	0.107111	0.0838262	0.0232851	0	0	0.803334	3.39263	14.5299	0	19.0425	0.59144	0.183952	0	0	0.267778	0.419131	3.13417	0.00698552	0	0.00465701	0.346947	0.0302706	0	0.0302706	0.0256136	1.01523	0	0	0.0558841	26.4984	0.230522	0.0861547	17.6058	0.018628	1.60434	0.0535556	0.0675267	2.57533	0	0	0.00232851	0.00698552	0.0628697	0.0232851	7.03674	0.0325991
CTL7	0.107	0.041154	0.0123462	0	0	1.81077	2.35195	14.3422	0.0781925	22.7499	0.674925	0.425943	0	0	0.067904	0.0576155	6.47352	0.0102885	0	0	0.211943	0.0144039	0	0.0555578	0.119346	0.321001	0.0041154	0.0020577	0.041154	23.1409	0.216058	0.107	20.6552	0.0823079	3.3808	0.0267501	0.041154	2.2326	0	0.0020577	0.0020577	0	0.0144039	0.0452694	0.0432117	0.0370386
CTL8	0.166934	0.145254	0.0607033	0.00216797	0	0.212462	1.55877	9.98569	0.0433595	14.7357	0.247149	0.169102	0	0	0.0238477	0.00433595	8.69575	0.0216797	0	0	1.62815	0.0108399	0	0.0476954	0.134414	0.0910549	0	0	0.0390235	38.6073	0.247149	0.173438	16.624	0.0650392	2.95061	0.125743	0.00216797	2.94628	0	0	0.00216797	0	0.00216797	0.0173438	0.136582	0.0758791
CTL9	0.04944	0.0408418	0.0451409	0	0	0.584682	2.31723	12.2181	0.159068	17.1363	0.427764	0.210658	0	0	0.44711	0	5.93065	0	0	0	0.260098	0.00859827	0	0.0408418	0.0752348	0.174115	0.00429913	0	0.0472905	36.059	0.303089	0.116077	17.4287	0.079534	0.911416	0.174115	0.0322435	2.24845	0	0	0.00214957	0.00214957	0.0408418	0.0451409	2.34733	0.0322435
Choline1	0.0304925	0.0479167	0.0196023	0	0	4.92018	2.72036	9.91658	0.135038	19.1689	0.481345	0.115436	0	0	0.413826	0.00217803	11.5741	0	0	0	0.457387	0.0217803	0	0.0239584	0.259186	0.124148	0.00217803	0	0.0805872	30.1832	0.307103	0.209091	11.9792	0.0326705	1.15	0.0522728	0.0500947	2.04299	0	0.193845	0	0	0.0196023	0.0283144	3.17339	0.0631629
Choline2	0.0745649	0.266303	0.0639127	0	0	2.19434	2.04947	12.8827	1.44656	11.3381	0.443128	0.112913	0	0	0.44952	0.0106521	7.93796	0	0	0	1.1696	0.014913	0	0.0426085	0.274825	0.0617823	0.00213042	0.00213042	0.0830866	42.551	0.419694	0.264173	9.21835	0.0170434	2.26251	0.44952	0.0298259	1.96212	0	0.413302	0.00426085	0	0.0170434	0.0532606	1.35495	0.0617823
Choline3	0.0770944	0.107076	0.0342642	0	0	2.60408	3.14802	17.1449	0.852321	19.7019	0.668151	0.197019	0	0	0.848038	0.0813774	3.30221	0	0	0	1.04934	0.0256981	0	0.0171321	0.171321	0.436868	0	0	0.0728114	26.9059	0.218434	0.158472	13.2131	0.0128491	1.26777	0.0728114	0.0813774	2.44989	0	0.36834	0.00428302	0	0.0385472	0.0299812	4.60425	0.0342642
Choline4	0.0061931	0.0681241	0.0588345	0	0	1.94154	4.61386	15.5106	0	12.8693	1.35629	0.198179	0	0	1.796	0.123862	10.6521	0	0	0.0061931	0.0928965	0.00309655	0.00928965	0.0309655	0.133152	1.63498	0	0	0.0588345	34.4336	0.253917	0.139345	9.5157	0.0185793	0.634793	0.182696	0.956834	2.55156	0	0.0185793	0	0	0.027869	0.0402552	0.0061931	0.0557379
Choline5	0.0028885	0.017331	0.0433276	0	0	1.72733	1.60023	10.8925	0	17.0884	0.785673	0.153091	0	0	0.629694	0	10.0809	0	0	0.0028885	0.121317	0.0028885	0	0.0722126	0.112652	0.00577701	0	0	0.147314	28.9081	0.352397	0.127094	22.2675	0.0808781	0.632582	0.196418	0.0635471	3.78105	0	0.0259965	0	0	0.0028885	0.0259965	0.00577701	0.0433276
Choline6	0.00477544	0.00955087	0.0262649	0.00238772	0	0.771233	4.56532	13.2853	0	13.2399	0.43934	0.148038	0	0	0.4083	0	7.22285	0	0	0.00238772	0.133712	0.0429789	0	0.0429789	0.0859578	0.728254	0	0	0.0859578	26.4105	0.319954	0.131324	27.645	0.121774	0.895394	0.312791	0.0644684	2.73632	0	0.0143263	0	0	0.0119386	0.076407	0	0.0143263
Choline7	0.017775	0.0377719	0.0511032	0	0	4.84369	1.72418	14.8777	0.0244406	8.40758	0.719888	0.159975	0	0	0.202191	0	10.074	0.00444375	0.00222188	0.00222188	0.235519	0.0155531	0	0.0399938	0.0977626	0.171084	0	0	0.0555469	38.2385	0.235519	0.0844313	16.3597	0.0466594	0.499922	0.0733219	0.124425	2.39963	0	0.00888751	0	0	0	0.00888751	0.0399938	0.115538
Choline8	0.0480808	0.0747923	0.0641077	0	0	1.11654	3.45647	13.078	0.2778	6.28523	0.779977	0.0213692	0	0.00534231	3.17066	0.00801346	2.84478	0.00534231	0	0.00267115	0.46211	0.00801346	0	0.0106846	0.109517	0.544915	0	0	0.0587654	20.3889	0.742581	0.1389	30.6595	0.0133558	4.80274	0.229719	2.25445	4.70123	0	0.0240404	0	0	0.00801346	0.630392	2.97032	0.00267115
Choline9	0.00255161	0.0229645	0.0204128	0	0	18.8513	1.92136	16.019	0.00510321	8.04777	1.04106	0.130132	0	0	0.0790998	0	7.03733	0.00510321	0	0.00255161	0.336812	0.0204128	0	0.0204128	0.0790998	0.637902	0	0	0.0382741	28.1085	0.247506	0.160751	14.5901	0.0382741	0.339364	0.096961	0.122477	1.8984	0	0.00765482	0	0	0	0	0	0.071445
MGF1	0.0717849	0.0897312	0.0574279	0.0107677	0	4.80959	0.122034	8.51369	0	19.9167	2.16073	0.154338	0	0	0.0717849	0.0179462	1.08754	0	0	0	0.513262	0	0	0.00717849	0.00358925	0.00717849	0	0	0.139981	10.6313	0.0574279	0	13.6894	0	1.27418	0.132802	0	2.59861	0	0.0646064	0	0	0	0	33.7963	0
MGF2	0.072879	0.0954966	0.0402091	0.0075392	0	3.22427	0.35183	7.94632	0	18.4208	1.56815	0.143245	0	0	0.263872	0.0552875	2.58846	0.00251307	0	0.00251307	0.369421	0.0075392	0	0.0150784	0	0.339264	0	0	0.100523	17.0662	0.120627	0	9.90651	0.0075392	1.60836	0.163349	0.0175915	2.24417	0	0.233715	0	0	0	0	33.0117	0.00502614
MGF3	0.161454	0.107636	0.0358787	0.00896968	0	6.09041	0.28105	13.2602	0	23.9879	2.59822	0.218262	0	0	0.0597979	0.182384	1.07636	0.00298989	0	0.00896968	0.532201	0.0298989	0	0.00597979	0.00298989	0.307959	0	0	0.0777372	9.75602	0.104646	0.00298989	9.04443	0.00597979	1.63547	0.056808	0.0298989	2.42779	0	0.27507	0	0.00298989	0	0	27.6206	0
MGF4	0.0628026	0.0889703	0.0340181	0.0130839	0	7.56248	0.277378	17.2288	0.198875	15.7163	0.934188	0.0785032	0	0	0.146539	0	2.04893	0.00261677	0	0.00261677	0.180557	0.00261677	0	0.0157006	0	0.180557	0	0	0.0758864	18.9978	0.0130839	0.00261677	25.0347	0.0183174	3.87282	0.0628026	0.00261677	3.97488	0	0.64111	0	0	0	0	2.5278	0
MGF5	0.0713475	0.129723	0.207556	0.0291876	0	11.2534	0.428085	11.208	0.0194584	17.892	6.65478	0.16864	0	0	0.113507	0.0097292	2.70472	0.0097292	0	0.00324307	0.233501	0.00648614	0	0	0	0.0097292	0.00324307	0	0.0875628	17.8012	0.0291876	0	16.491	0.00324307	2.72742	0.0291876	0.0097292	4.78028	0	0.356737	0	0	0	0	6.52181	0.00648614
MGF6	0.204556	0.197622	0.0866761	0.00346705	0	4.41355	0.329369	12.998	0.0416045	9.83601	2.06983	0.0208023	0	0	1.13719	0.0416045	2.09063	0.00693409	0	0	0.436848	0.00693409	0	0.0173352	0	0.204556	0	0	0.0624068	7.54429	0.0208023	0.0104011	19.8454	0	25.1291	0.0866761	0.0624068	8.37292	0	0.454183	0	0.00693409	0	0	4.25753	0.00346705
MGF7	0.290724	0.180294	0.144235	0.0112684	0	8.24844	0.423691	11.8476	0.270441	16.8575	2.80357	0.108176	0	0	0.869918	0.164518	3.96872	0.00225367	0	0	0.741459	0.00676102	0	0.013522	0	0.0247904	0	0	0.132967	14.5677	0.108176	0	11.1061	0.00901469	2.65032	0.0743712	0.00450735	3.99802	0	0.407915	0	0	0	0	19.954	0.00901469
MGF8	0.0144217	0.144217	0.0324488	0.0144217	0	6.83949	0.450678	14.1477	0.133401	25.5841	2.63556	0.155033	0	0	0.0216325	0.025238	1.15734	0.0180271	0	0	0.0396596	0.0216325	0	0.00721085	0	3.26651	0	0	0.118979	11.6744	0.0108163	0	6.84309	0.0108163	3.44678	0.0540813	0.0396596	3.17998	0	0.475916	0	0	0	0	19.4368	0
MGF9	0.110831	0.0526447	0.0720401	0.00831232	0	5.35036	0.493198	14.7294	0.659444	16.9682	3.30553	0.0969771	0	0	2.34407	0.141309	1.87581	0.00831232	0	0	0.157934	0.0138539	0	0.0138539	0	0.0692693	0	0	0.085894	8.5229	0.0748109	0	13.8289	0	1.59042	0.024937	0.00277077	3.8486	0	0.368513	0	0	0	0	25.178	0.00277077

## Sheet: Key genus
Relative abundance of key genus (%)	g__Acetatifactor	g__Akkermansia	g__Alistipes	g__Allobaculum	g__Bacteroides	g__Bilophila	g__Blautia	g__Desulfovibrio	g__Dubosiella	g__Faecalibaculum	g__GCA-900066575	g__Helicobacter	g__Ileibacterium	g__Lachnospiraceae_UCG-006	g__Odoribacter	g__Oscillibacter	g__Parabacteroides	g__Rikenella	g__Roseburia	g__Ruminiclostridium	g__norank_f__Erysipelotrichaceae	g__norank_f__Lachnospiraceae	g__norank_o__Gastranaerophilales	g__unclassified_f__Lachnospiraceae	g__unclassified_f__Ruminococcaceae
CTL1	3.89133	0.0314207	4.99347	0	1.75956	1.82965	8.46184	2.58133	0.548654	0.652584	5.6799	6.19471	0	0.290037	0.478561	4.28047	0.700923	1.02238	1.14081	4.31914	0	6.36148	0.0700923	6.77237	1.281
CTL2	4.23655	3.47475	3.22182	0	0.213785	6.23287	0.120442	2.24624	1.02677	0.822017	3.12547	4.81768	1.48144	0.174641	0.355304	8.21113	0.11442	0.671464	0.340249	5.66981	0.352293	4.26666	0.111409	4.47141	3.36937
CTL3	1.3362	0.00265118	9.59463	0.00265118	6.10568	2.9216	0.421538	2.09178	0.623028	0.588563	3.51282	4.40892	0	0.225351	1.43429	1.97513	0.914658	1.42634	1.56685	2.94547	0.00530237	3.92905	0.124606	3.60826	2.00164
CTL4	4.34565	1.79475	7.8057	0	0.812051	1.18277	0.288337	0.915029	6.09627	5.13711	1.84477	1.76827	7.10545	0.582559	0.750265	1.7771	0.182417	0.344239	0.859127	1.96834	2.01836	5.45192	0.0941509	9.55631	1.52113
CTL5	0.568532	0.00268176	8.17399	0	2.02204	1.61978	1.04857	1.11293	0.429081	0.474671	1.26043	8.24908	0.00268176	0.329856	1.91477	2.12127	0.587305	1.73241	1.95768	4.09504	0.00536351	4.2774	0.292311	4.33908	2.38408
CTL6	2.47287	7.03674	17.3427	0	0.803334	1.41573	0.356261	0.980301	0.384203	0.386532	3.91189	3.13417	0.586783	0.0977972	3.39263	2.75695	0.59144	0.854562	0.0256136	3.29018	0.230522	3.30648	0.267778	3.66041	1.99553
CTL7	1.74081	0.0432117	21.0502	0	1.81077	1.24285	3.09684	0.72431	0.798387	0.516482	2.07827	6.47352	1.78814	0.131693	2.35195	1.0021	0.674925	1.54739	3.04745	1.97127	0.269558	2.90958	0.067904	3.02687	0.923906
CTL8	4.60911	0.136582	12.5656	0	0.212462	1.08399	12.5677	1.74522	0.67424	0.50297	2.99831	8.69575	1.51541	0.14959	1.55877	2.18749	0.247149	2.01838	2.68829	3.71157	0.244981	3.30399	0.0238477	4.8064	1.33114
CTL9	3.34903	2.34733	15.4403	0.00214957	0.584682	0.565336	2.7106	1.4961	0.260098	0.116077	3.2351	5.93065	0.432063	0.266546	2.31723	2.52359	0.427764	1.4875	1.36068	1.97975	0.0902818	5.1955	0.44711	5.2342	1.57348
Choline1	1.01496	3.17339	17.9579	0	4.92018	1.20663	0.126326	0.699148	0.248296	0.533618	0.139394	11.5741	0.274432	0.0871213	2.72036	1.51591	0.481345	0.943088	0.991005	1.7054	0.0914774	4.81999	0.413826	2.14972	1.38523
Choline2	1.07799	1.35495	10.4156	0	2.19434	0.960821	32.881	0.8053	0.513432	1.00343	0.206651	7.93796	0.534737	0.0788257	2.04947	0.826605	0.443128	0.786127	1.20582	1.7789	0.206651	1.73417	0.44952	2.28595	0.483606
Choline3	1.03649	4.60425	18.5498	0	2.60408	1.27634	2.10725	0.955114	0.308378	0.599623	0.278396	3.30221	0.222717	0.0599623	3.14802	1.14357	0.668151	0.899435	0.775227	1.50762	0.137057	3.26795	0.848038	2.06442	1.50334
Choline4	4.79036	0.0061931	11.6152	0	1.94154	1.10857	14.625	1.30674	0.340621	0.250821	0.786524	10.6521	0	0.0712207	4.61386	1.02496	1.35629	1.04973	1.03425	1.51112	0.0433517	3.08416	1.796	3.49601	1.5266
Choline5	3.67129	0.00577701	14.7949	0	1.72733	0.904102	10.959	2.48989	0.384171	0.207972	0.453495	10.0809	0.0028885	0.17331	1.60023	1.40381	0.785673	2.12883	1.75332	3.99769	0.0375505	4.26921	0.629694	4.18833	1.01386
Choline6	2.61694	0	11.781	0	0.771233	0.668561	1.12939	1.95077	0.49187	0.346219	1.2249	7.22285	0	0.10506	4.56532	0.704377	0.43934	1.31086	3.56486	1.69289	0.0573052	3.02763	0.4083	2.93928	1.69528
Choline7	4.07714	0.0399938	7.01446	0	4.84369	1.73529	19.9036	0.517697	0.171084	0.328838	1.2087	10.074	0	0.133313	1.72418	2.00413	0.719888	1.25758	2.47073	3.57056	0	3.23061	0.202191	3.46613	1.2087
Choline8	2.23041	2.97032	5.0378	0.00267115	1.11654	1.90186	5.02177	2.50287	1.86714	2.92759	1.24743	2.84478	0	0.144242	3.45647	6.71528	0.779977	0.996341	0.689158	5.12862	0.00534231	2.98635	3.17066	1.75762	6.1303
Choline9	2.40361	0	6.43515	0	18.8513	1.35745	9.3797	0.436325	0.122477	0.211783	3.43701	7.03733	0	0.290883	1.92136	2.19183	1.04106	1.28601	0.71445	2.65367	0	1.45697	0.0790998	4.20505	0.972162
MGF1	0.0107677	33.7963	19.705	0	4.80959	0.0681957	1.23829	2.51965	0	1.07318	0.696314	1.08754	0	0.689135	0.122034	0.771688	2.16073	0.104088	0.437888	0.315854	0.172284	2.08176	0.0717849	1.76591	0.646064
MGF2	0.801669	33.0117	18.2398	0	3.22427	0.178428	3.39013	1.99035	0	1.37967	0.54031	2.58846	0	0.500101	0.35183	1.47768	1.56815	0.118114	0.31162	0.397065	0.223663	1.2892	0.263872	2.26176	0.47497
MGF3	0.606949	27.6206	23.6172	0	6.09041	0.227232	0.254141	2.13478	0	1.4202	0.484363	1.07636	0	0.421575	0.28105	0.687676	2.59822	0.29301	0.248161	0.645817	0.206303	1.77002	0.0597979	1.36638	0.744484
MGF4	0.125605	2.5278	14.0913	1.76371	7.56248	0.0601858	0.128222	3.32854	0.00785032	1.51511	1.00746	2.04893	0	2.51734	0.277378	1.44969	0.934188	1.45231	0.361115	0.546906	0.586157	2.87583	0.146539	5.22831	1.50464
MGF5	0	6.52181	17.5126	0.875628	11.2534	0.0843198	0.278904	3.45387	0.00324307	1.07021	0.963191	2.70472	0	3.19118	0.428085	1.55019	6.65478	0.11675	0.204313	0.15891	0.778336	0.4443	0.113507	2.62364	0.755635
MGF6	0	4.25753	8.80976	10.4462	4.41355	0.249627	0.131748	6.681	0.162951	9.82561	0.606733	2.09063	0.0450716	0.828624	0.329369	2.54828	2.06983	0.648338	0.176819	0.963839	4.64931	0.759283	1.13719	2.39573	1.47349
MGF7	0.00225367	19.954	16.6321	0	8.24844	0.0833859	0.0585955	3.88533	0	1.54827	0.428198	3.96872	0	0.973587	0.423691	0.829352	2.80357	0.148742	0.597223	0.0585955	1.10205	2.02605	0.869918	1.46489	0.549896
MGF8	0.201904	19.4368	24.982	2.2606	6.83949	0.0757139	0.284828	2.49856	0	0.757139	0.328093	1.15734	0	0.255985	0.450678	1.17897	2.63556	0.4651	0.12619	0.198298	0.429045	1.36285	0.0216325	1.82434	0.908566
MGF9	0	25.178	16.5138	0	5.35036	0.119143	0.0526447	3.61032	0	1.04458	0.318639	1.87581	0	0.454407	0.493198	1.42141	3.30553	0.0166246	0.24937	0.085894	0.545842	1.25793	2.34407	0.925438	1.25793
